# Supplementary material for: C9orf72 frontotemporal lobar degeneration is characterised by frequent neuronal sense and antisense RNA foci
Source: Springer Nature journal article supplement (doi:10.1007/s00401-013-1200-z), 2013-10-29
Supplement: MOESM1 [file 401_2013_1200_MOESM1_ESM.pdf]

**C9orf72 frontotemporal lobar degeneration is characterised by frequent neuronal sense and antisense RNA foci**

***Acta Neuropathologica***

Sarah Mizielska, Tammarny Lashley, Frances Norona, Emma L. Clayton, Charlotte E. Ridler, Pietro Fratta and Adrian M. Isaacs.

**Corresponding author:**

Dr Adrian Isaacs

Department of Neurodegenerative Disease, UCL Institute of Neurology, Queen Square, London WC1N 3BG

a.isaacs@prion.ucl.ac.uk

**Supplementary Table 1. Supplier and catalogue numbers for FISH reagents used in this study.**

| <b>Reagent</b>                 | <b>Supplier</b>     | <b>Catalogue number</b> |
|--------------------------------|---------------------|-------------------------|
| Formamide deionized            | Amresco             | 606                     |
| 20x SSC Buffer                 | Sigma               | S6639                   |
| tRNA from baker's yeast        | Sigma               | R5636                   |
| ssDNA from salmon testes       | Sigma               | D7656                   |
| BSA                            | Sigma               | B8667                   |
| Dextran sulphate               | Sigma               | D8906                   |
| EDTA                           | Sigma               | E5134                   |
| Ribonucleoside vanadyl complex | New England Biolabs | S1402S                  |
| RNase A                        | Sigma               | R6513                   |
| TURBO™ Dnase                   | Ambion              | AM2238                  |

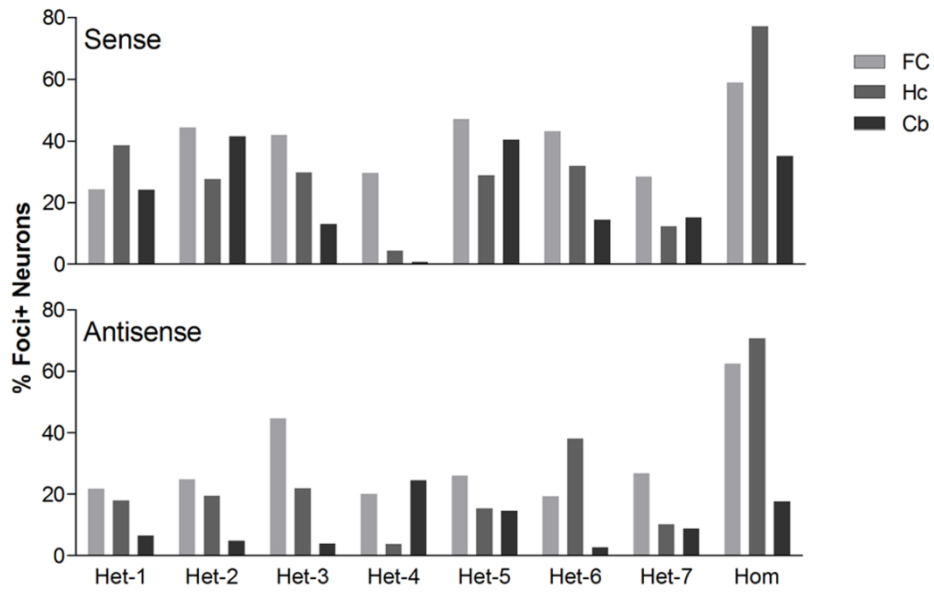

**Supplementary Fig. 1** Differences in anatomical distribution of sense and antisense foci are relatively consistent between cases. Bar graphs show percentage of sense or antisense foci-containing neurons in the frontal cortex (FC), hippocampus (Hc) and cerebellum (Cb) for individual heterozygous C9FTLD cases (Het 1-7) and the homozygous C9FTLD case (Hom).

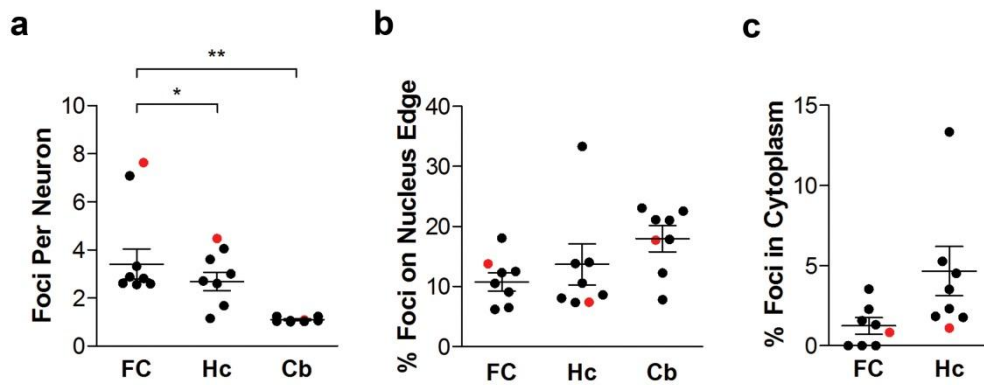

**Supplementary Fig. 2** Localisation and frequency of antisense RNA foci within neurons. RNA FISH for sense foci was combined with immunostaining for neurons with NeuN and nuclear DNA staining with DAPI in the frontal cortex (FC), hippocampus (Hc) and cerebellum (Cb) of 8 C9FTLD cases, as shown in Figure 5. **(a)** The number of foci per neuron was quantified for each case. Significantly more antisense RNA foci per neuron were found in the frontal cortex and hippocampus than in the cerebellum, as was found for sense foci. **(b)** Quantification of the percentage of neuronal antisense RNA foci that are present on the edge of the nucleus and **(c)** within the cytoplasm. In each panel, each dot represents an individual C9FTLD case with the homozygous C9FTLD case shown in red and the average and SEM of heterozygous cases shown as long and short horizontal bars respectively. Significance was determined using one-way ANOVA and *post hoc* Bonferroni test: \* $p < 0.05$ , \*\* $p < 0.01$ .

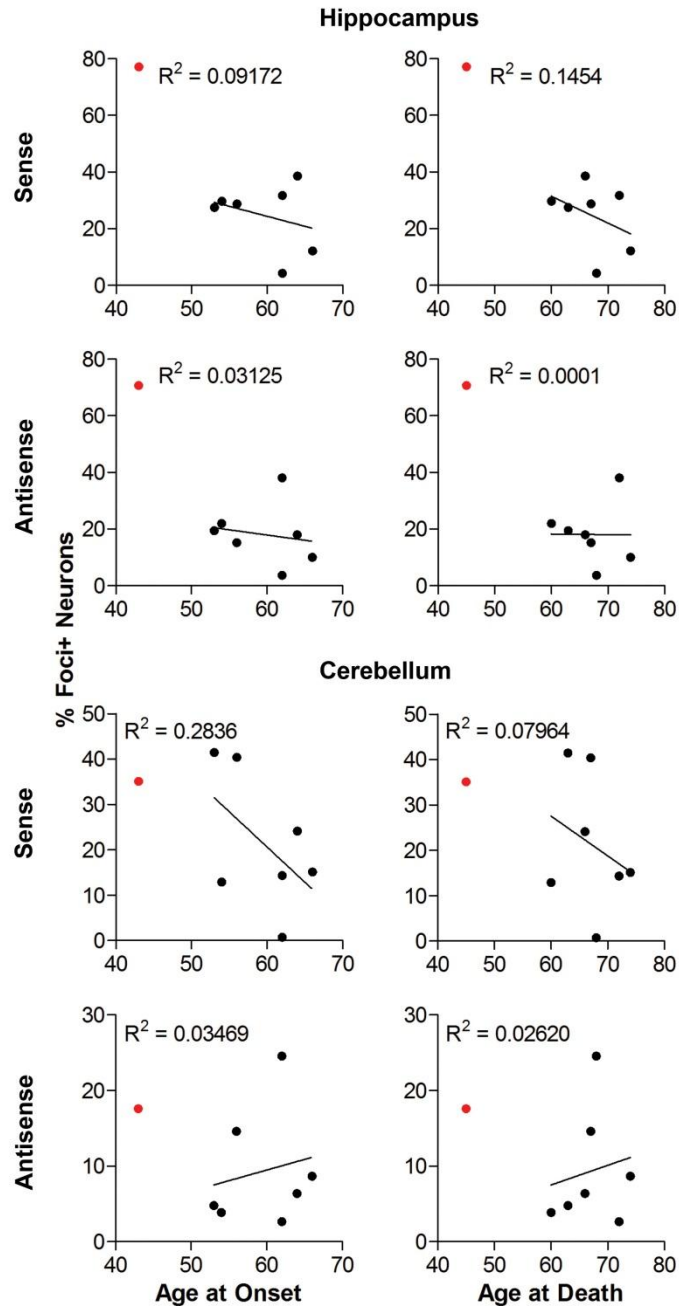

**Supplementary Fig. 3** Clinical phenotype correlation with neuronal foci burden in the hippocampus and cerebellum of C9FTLD patient brain. Age at onset of disease or age at death were plotted against percentage of sense or antisense foci-containing neurons in the hippocampus and cerebellum for each individual case. Linear regressions were performed on data from heterozygous C9FTLD cases, with  $R^2$  shown as a measure of goodness-of-fit of the linear trend. Each dot represents an individual C9FTLD case with the homozygous C9FTLD case shown in red, even though it is not included in the linear regression analysis.
